# Supplementary material
Source: Springer Nature journal article supplement (https://www.springermedizin.de/resource/supplementary/12913_2013_3740_MOESM8_ESM.pdf/9532248)

Q: Do you believe an AChE level is helpful in treating OP poisoning?

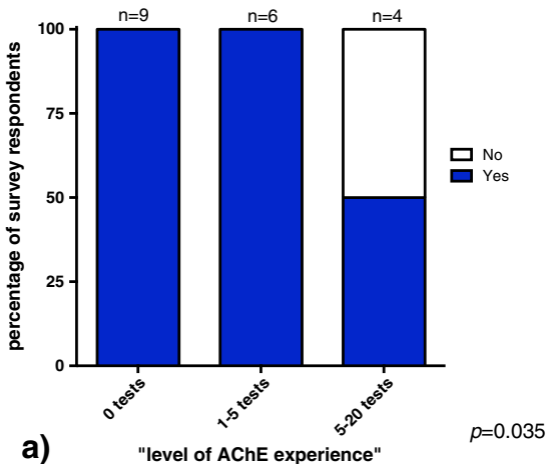

Q: Do you believe an AChE level is helpful in "guiding oxime therapy"?

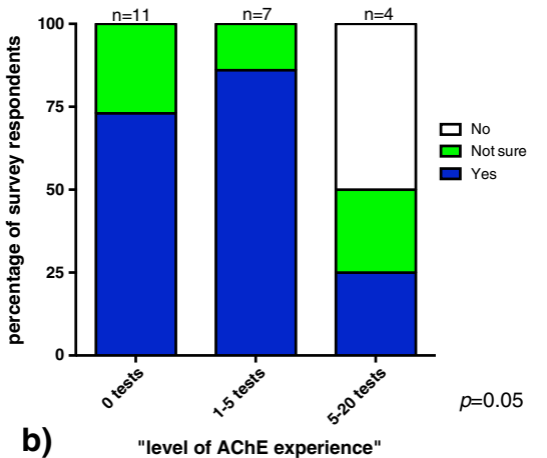

Supplement: MOESM8 [file 9532248]
